# Supplementary material for: Mucosal-Associated Invariant T cells exhibit distinct functional signatures associated with protection against typhoid fever
Source: PubMed Central journal article supplement (PMC9377420; doi:10.1016/j.cellimm.2022.104572), 2022-08
Supplement: mmc1.pdf [file mmc1.pdf]

***Mucosal-Associated Invariant T cells exhibit distinct functional signatures associated with protection against typhoid fever***

Rosângela Salerno-Goncalves, Stephanie Fresnay, Laurence Magder, Thomas C. Darton, Claire S. Waddington, Christoph J. Blohmke, Brian Angus, Myron M. Levine, Andrew J. Pollard, and Marcelo B. Sztein

**Supplementals**

**S1 Table.** Demographics of the participants included in this study

|                                                                       | NoTF*<br>(N=13)            | TF**<br>(N=7)             |
|-----------------------------------------------------------------------|----------------------------|---------------------------|
| <b>Age</b>                                                            |                            |                           |
| Mean (SD)                                                             | 29 (± 7)                   | 30 (± 10)                 |
| Range                                                                 | 19-43                      | 20-46                     |
| <b>Gender</b>                                                         |                            |                           |
| Female                                                                | 6 (46)                     | 0 (0)                     |
| Male                                                                  | 7 (54)                     | 7 (100)                   |
| <b>S. Typhi challenge dose</b>                                        |                            |                           |
| Mean                                                                  | 1.54 x 10 <sup>4</sup>     | 1.18 x 10 <sup>4</sup>    |
| Range                                                                 | 0.07-2.7 x 10 <sup>4</sup> | 0.1-2.7 x 10 <sup>4</sup> |
| <b>Time to Clinical Diagnosis, day</b>                                |                            |                           |
| Mean                                                                  | -                          | 7                         |
| Range                                                                 | -                          | 6-9                       |
| <b>Total Lymphocyte count, x 10<sup>3</sup>/μl, mean (SD)</b>         |                            |                           |
| Day 0                                                                 | 2.05 (± 0.41)              | 2.53 (± 1.41)             |
| Day 1-4                                                               | 2.08 (± 0.65)              | 2.23 (± 1.17)             |
| Day 7-10 (48-96 hs) <sup>†</sup>                                      | 1.70 (± 0.58)              | 1.03 (± 0.42)             |
| Day 14-28                                                             | 1.97 (± 0.59)              | 2.22 (± 1.04)             |
| <b>Symptoms</b>                                                       |                            |                           |
| Fever > 38°C followed by <i>S. Typhi</i> isolation from blood culture | -                          | 7                         |
| Neither fever nor bacteremia                                          | 9                          | -                         |
| Bacteremia only                                                       | 3                          | -                         |
| Fever only                                                            | 1                          | -                         |

\*, NoTF, volunteers who did not meet the clinical typhoid fever definition; \*\*, TF, volunteers with typhoid fever diagnosis;

† , *t*-test NoTF vs. TF, *P* =0.0002

# S1 Figure

Gated on MAIT cells

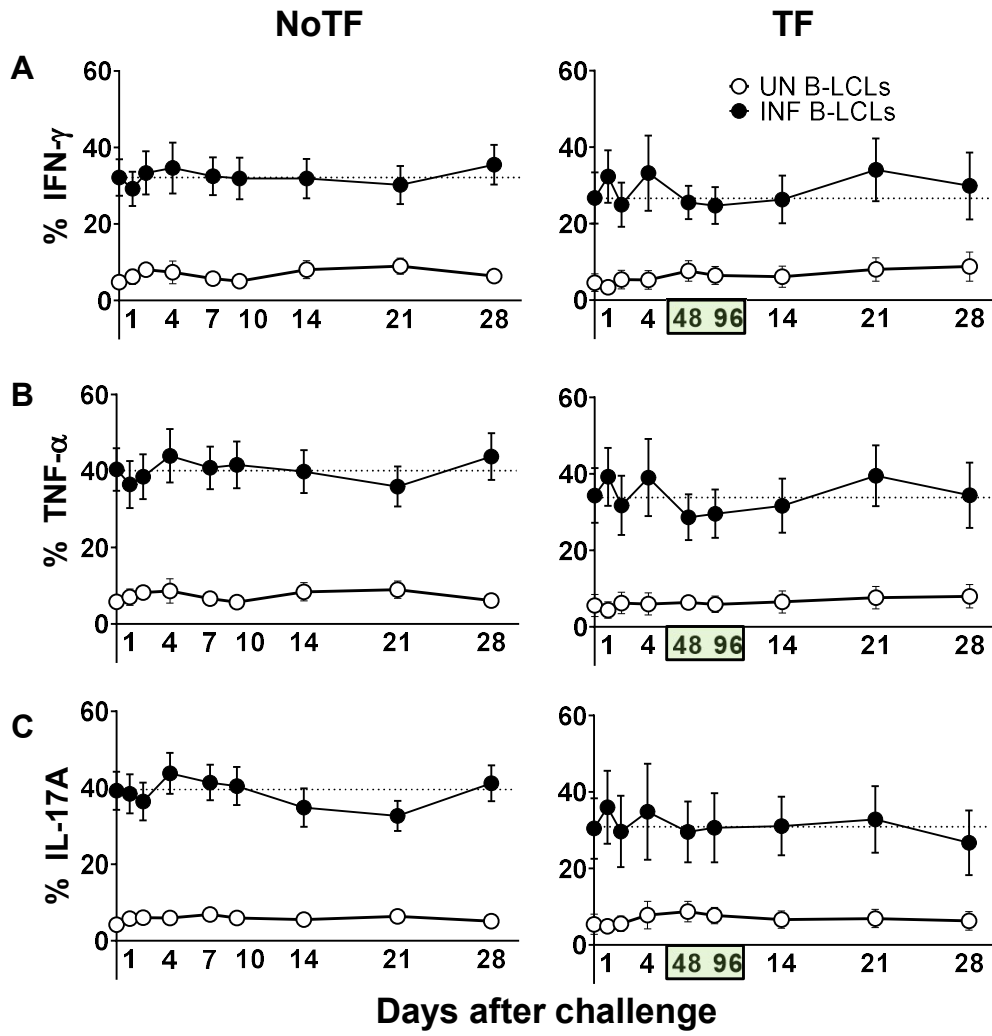

# S2 Figure

Gated on MAIT cells

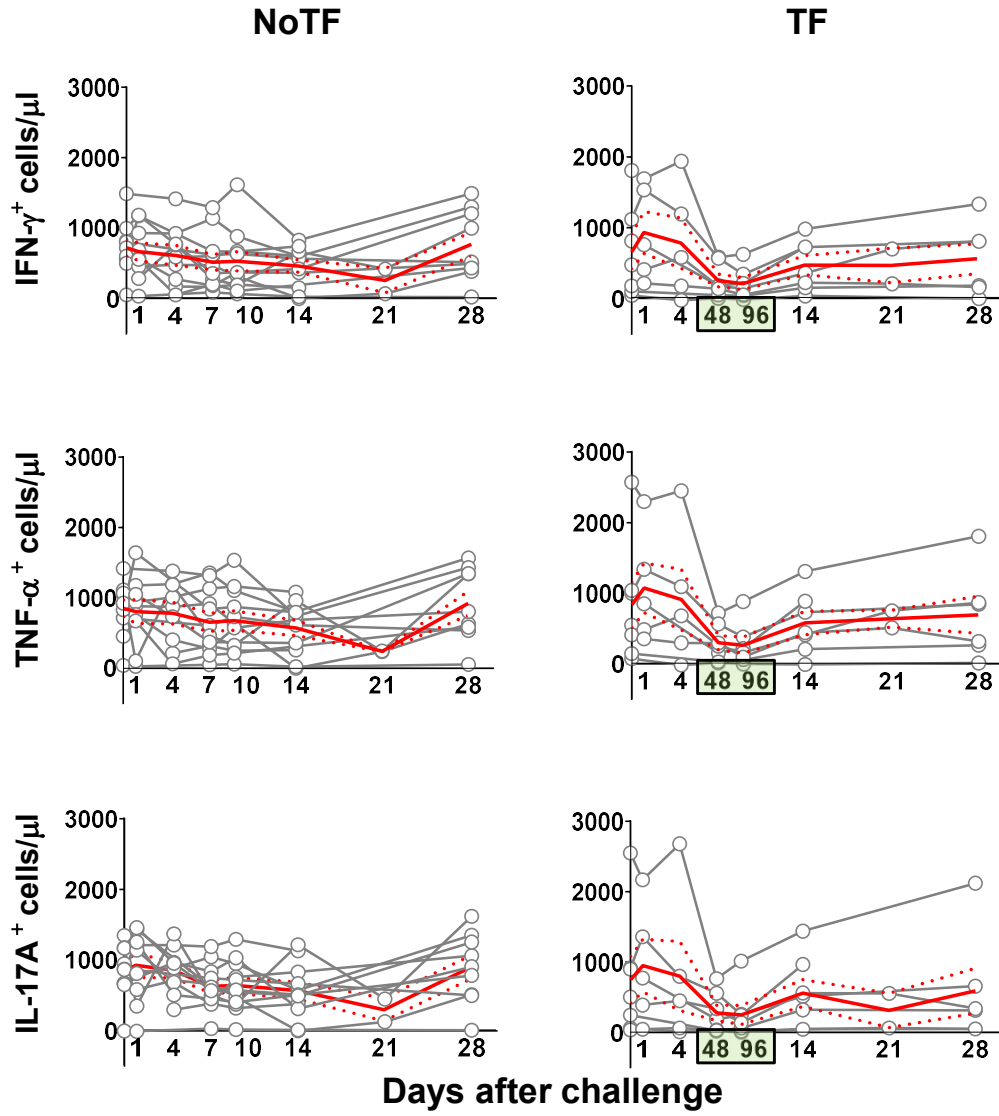

# S3 Figure

Gated on MAIT cells

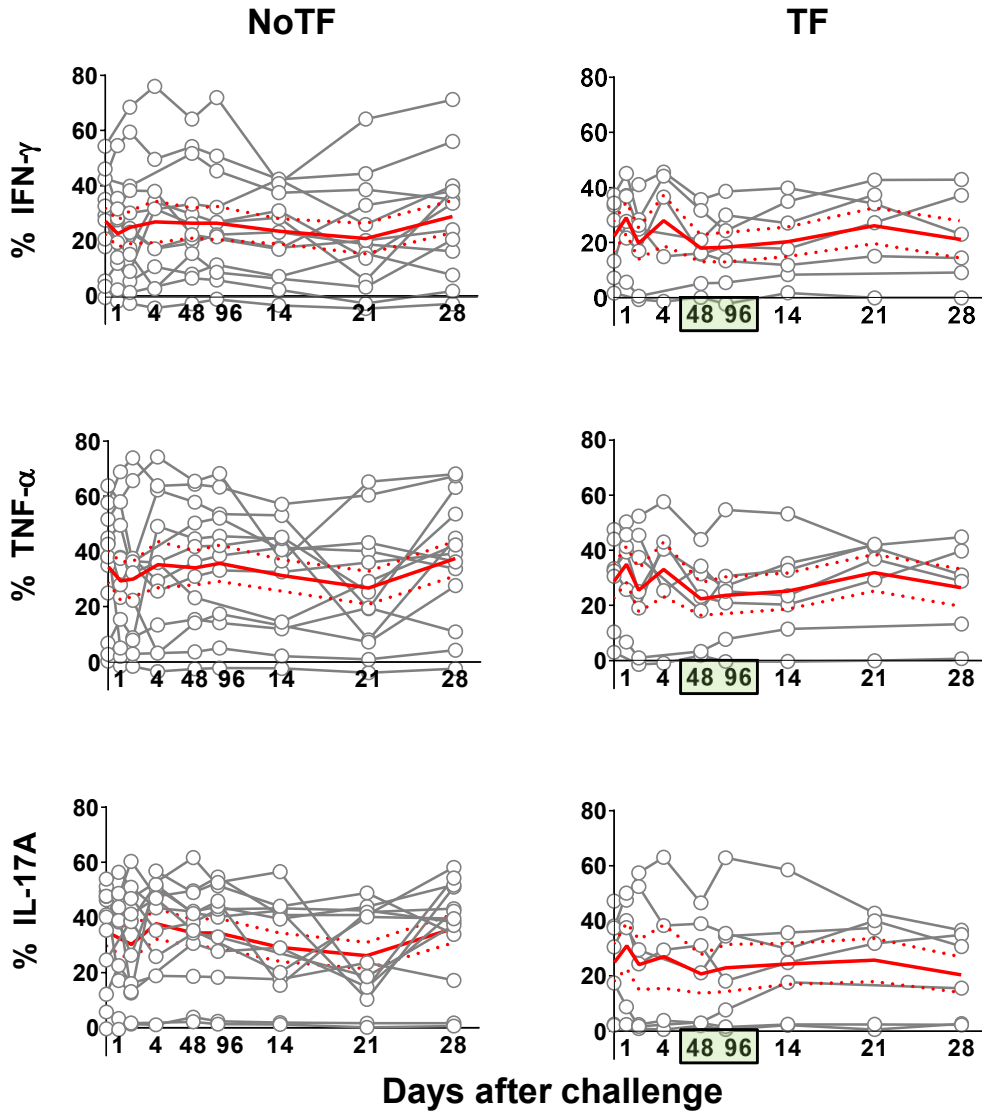

# S4 Figure

Gated on MAIT cells

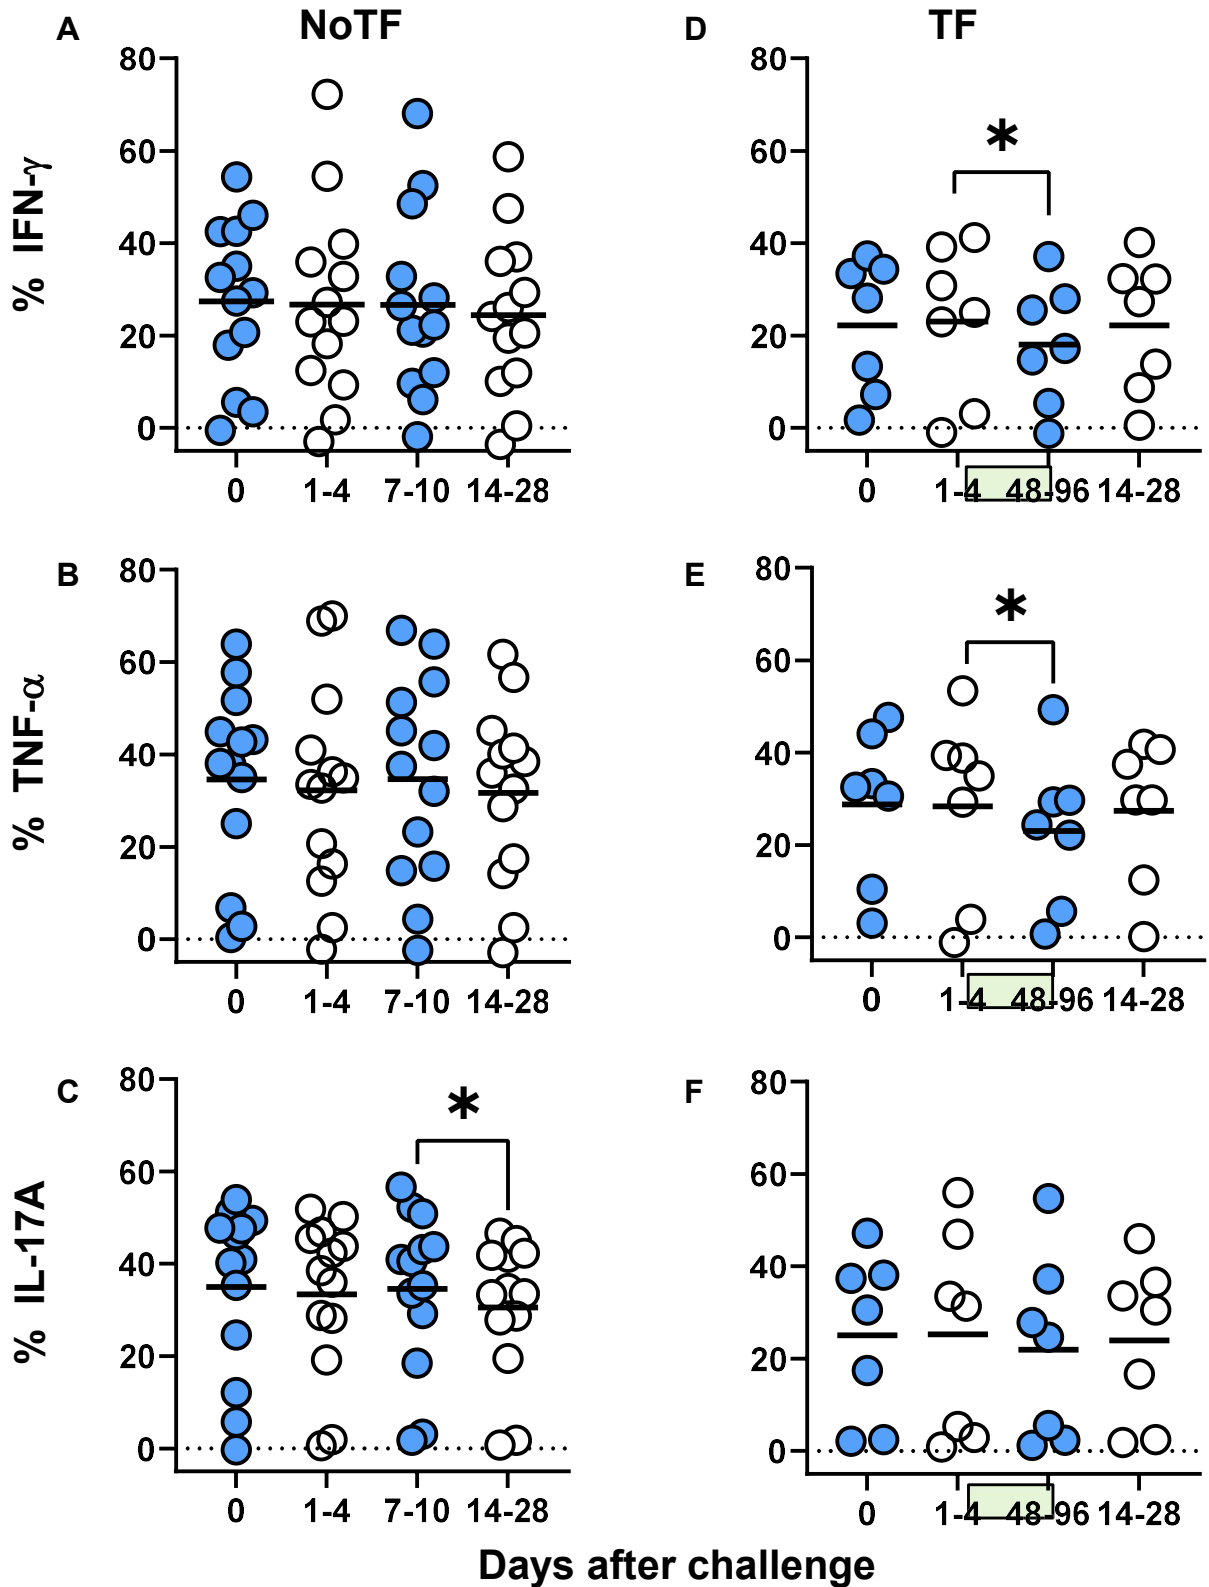

# S5 Figure

Gated on MAIT cells

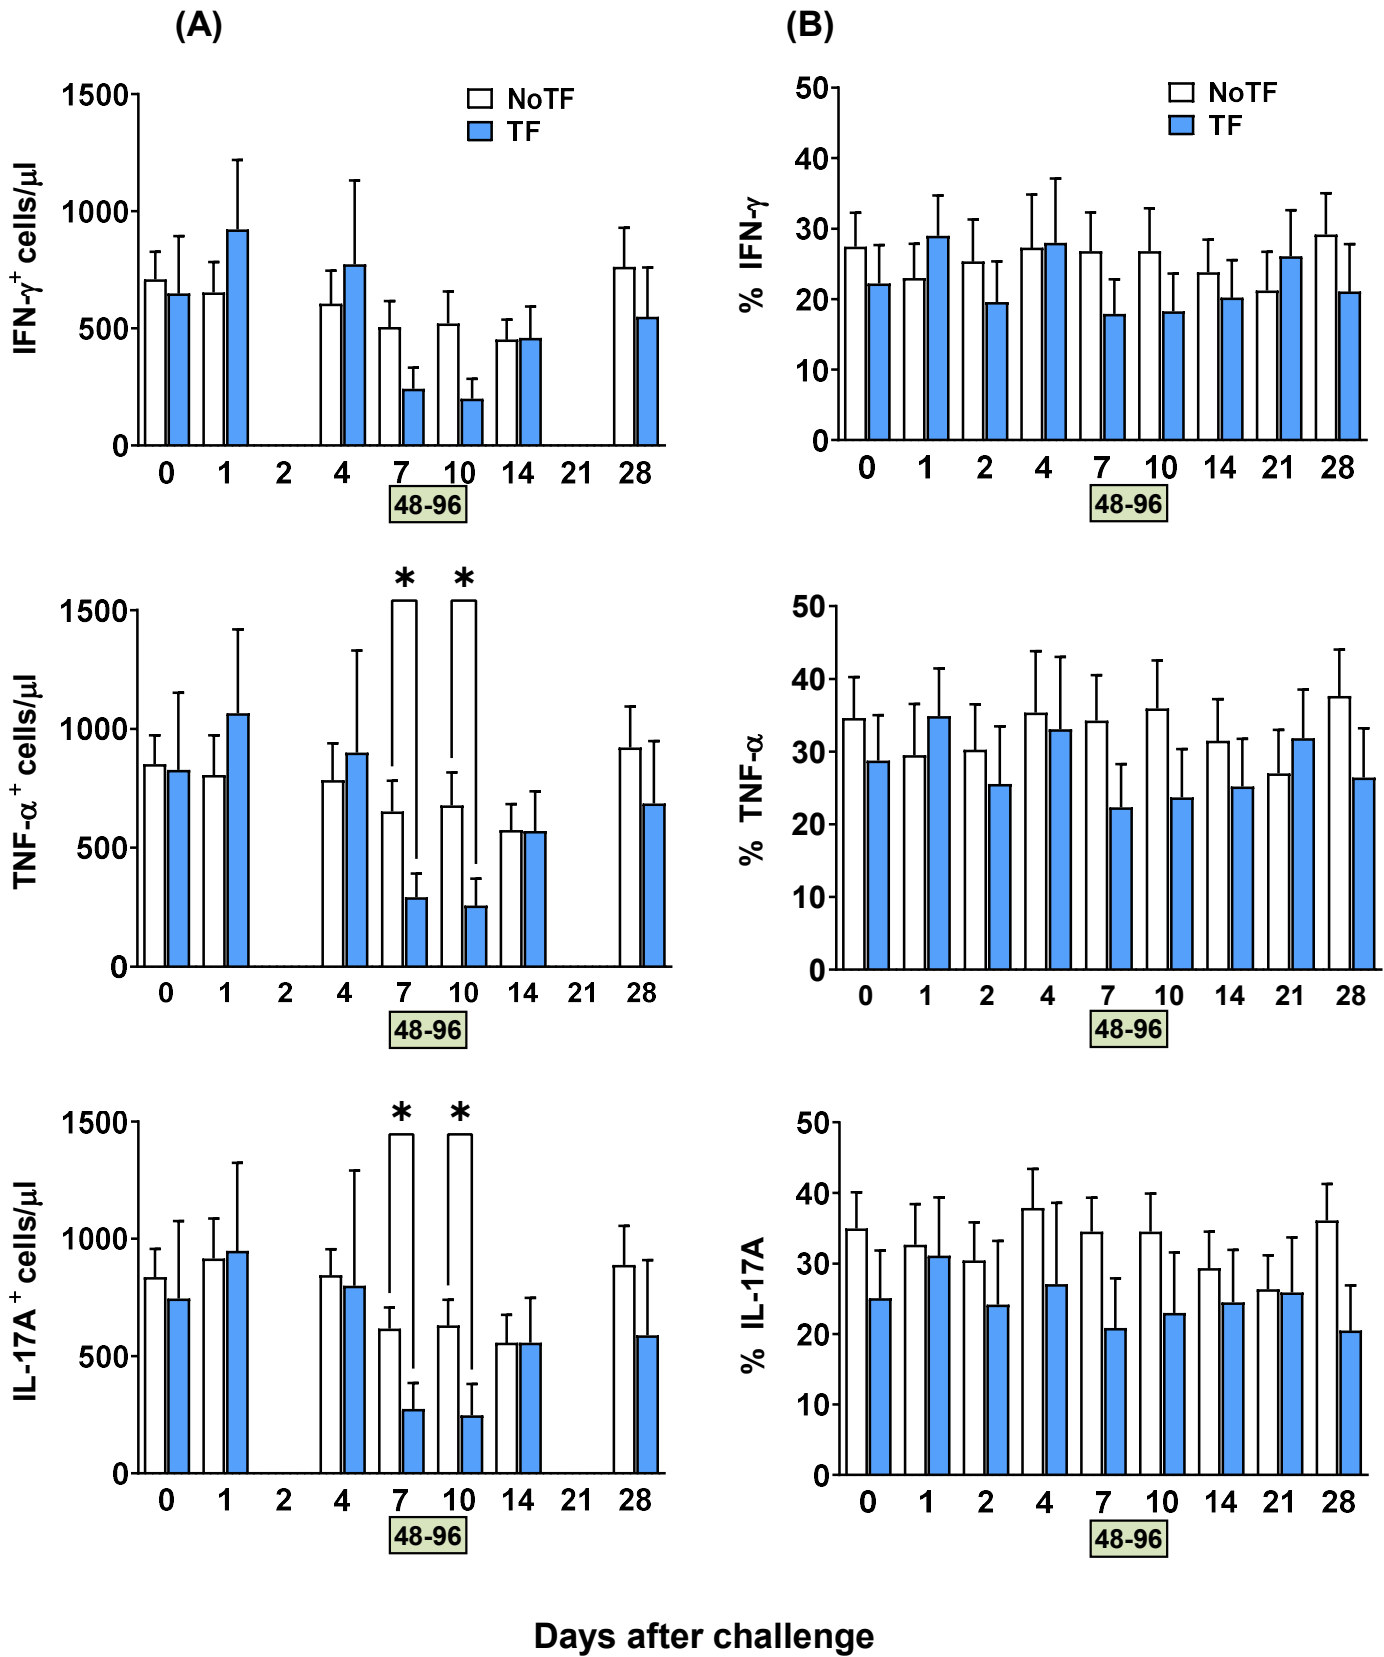

# S6 Figure

## Total IFN- $\gamma$

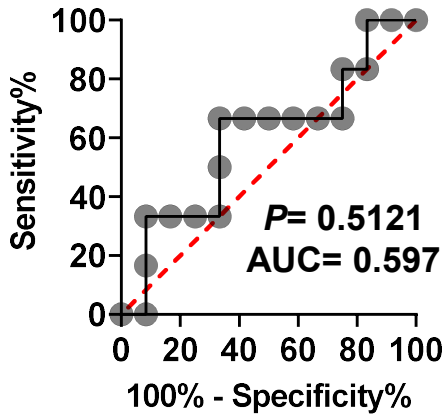

## Total TNF- $\alpha$

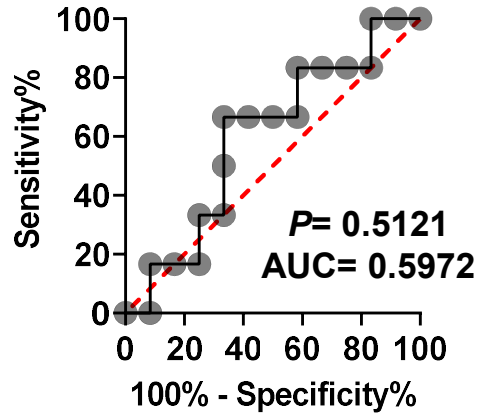

## Total IL-17A

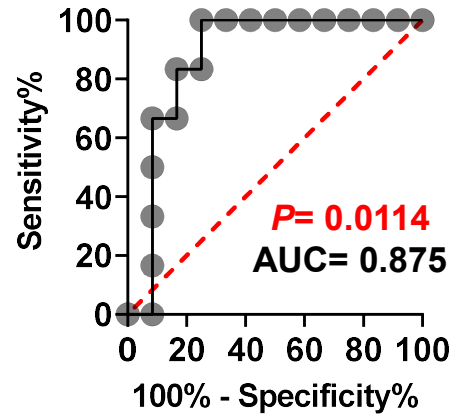



# S7 Figure

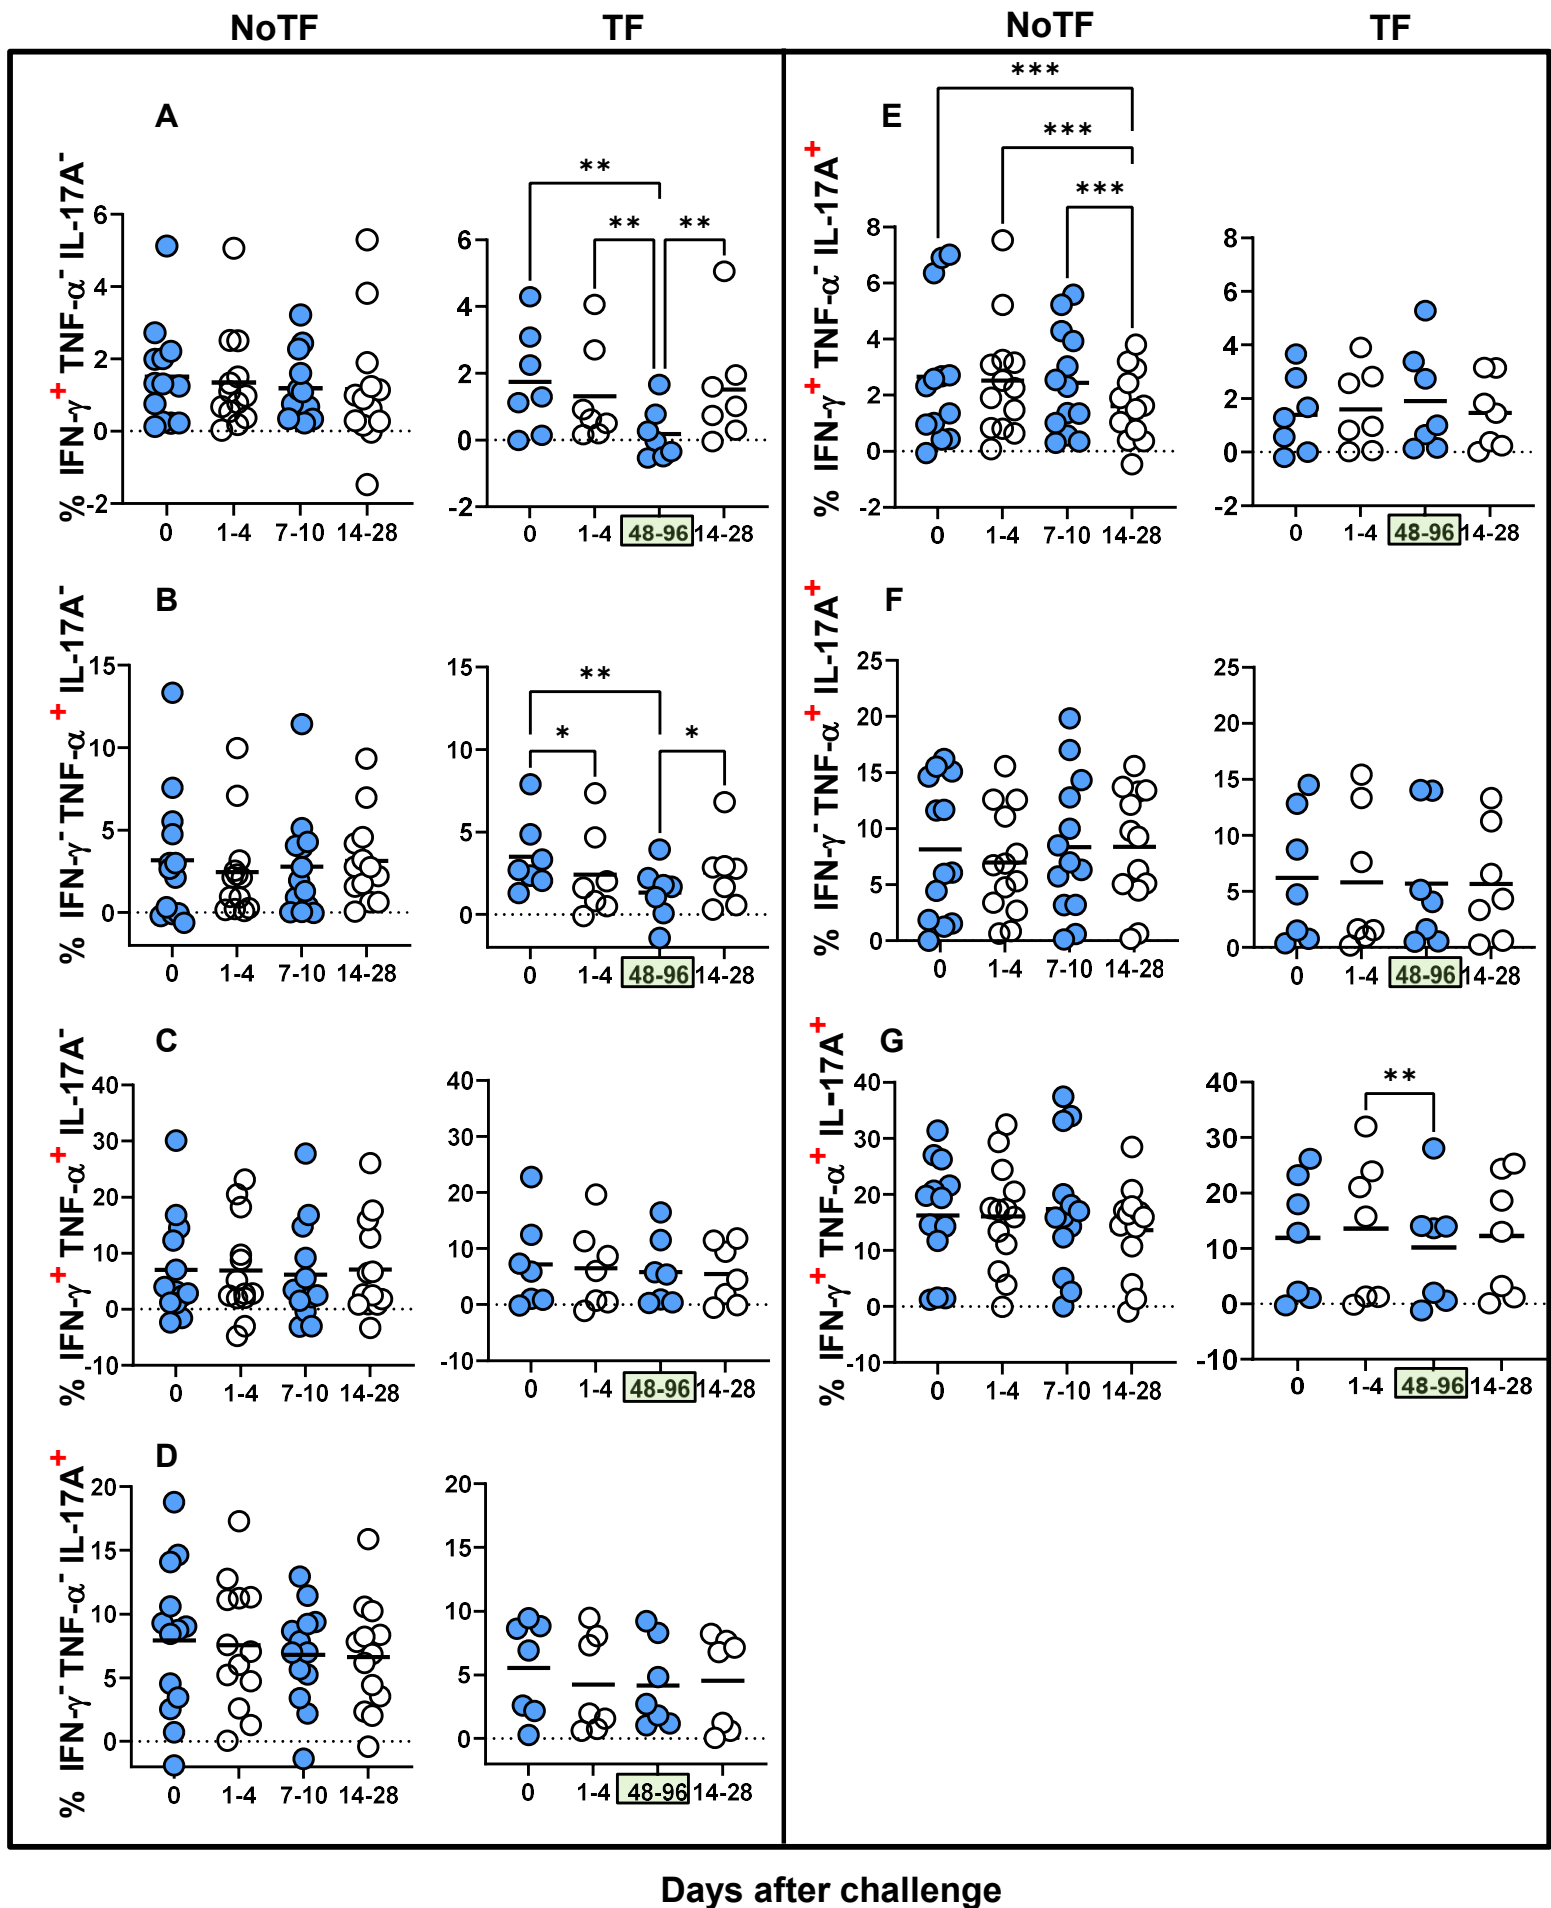

# S8 Figure

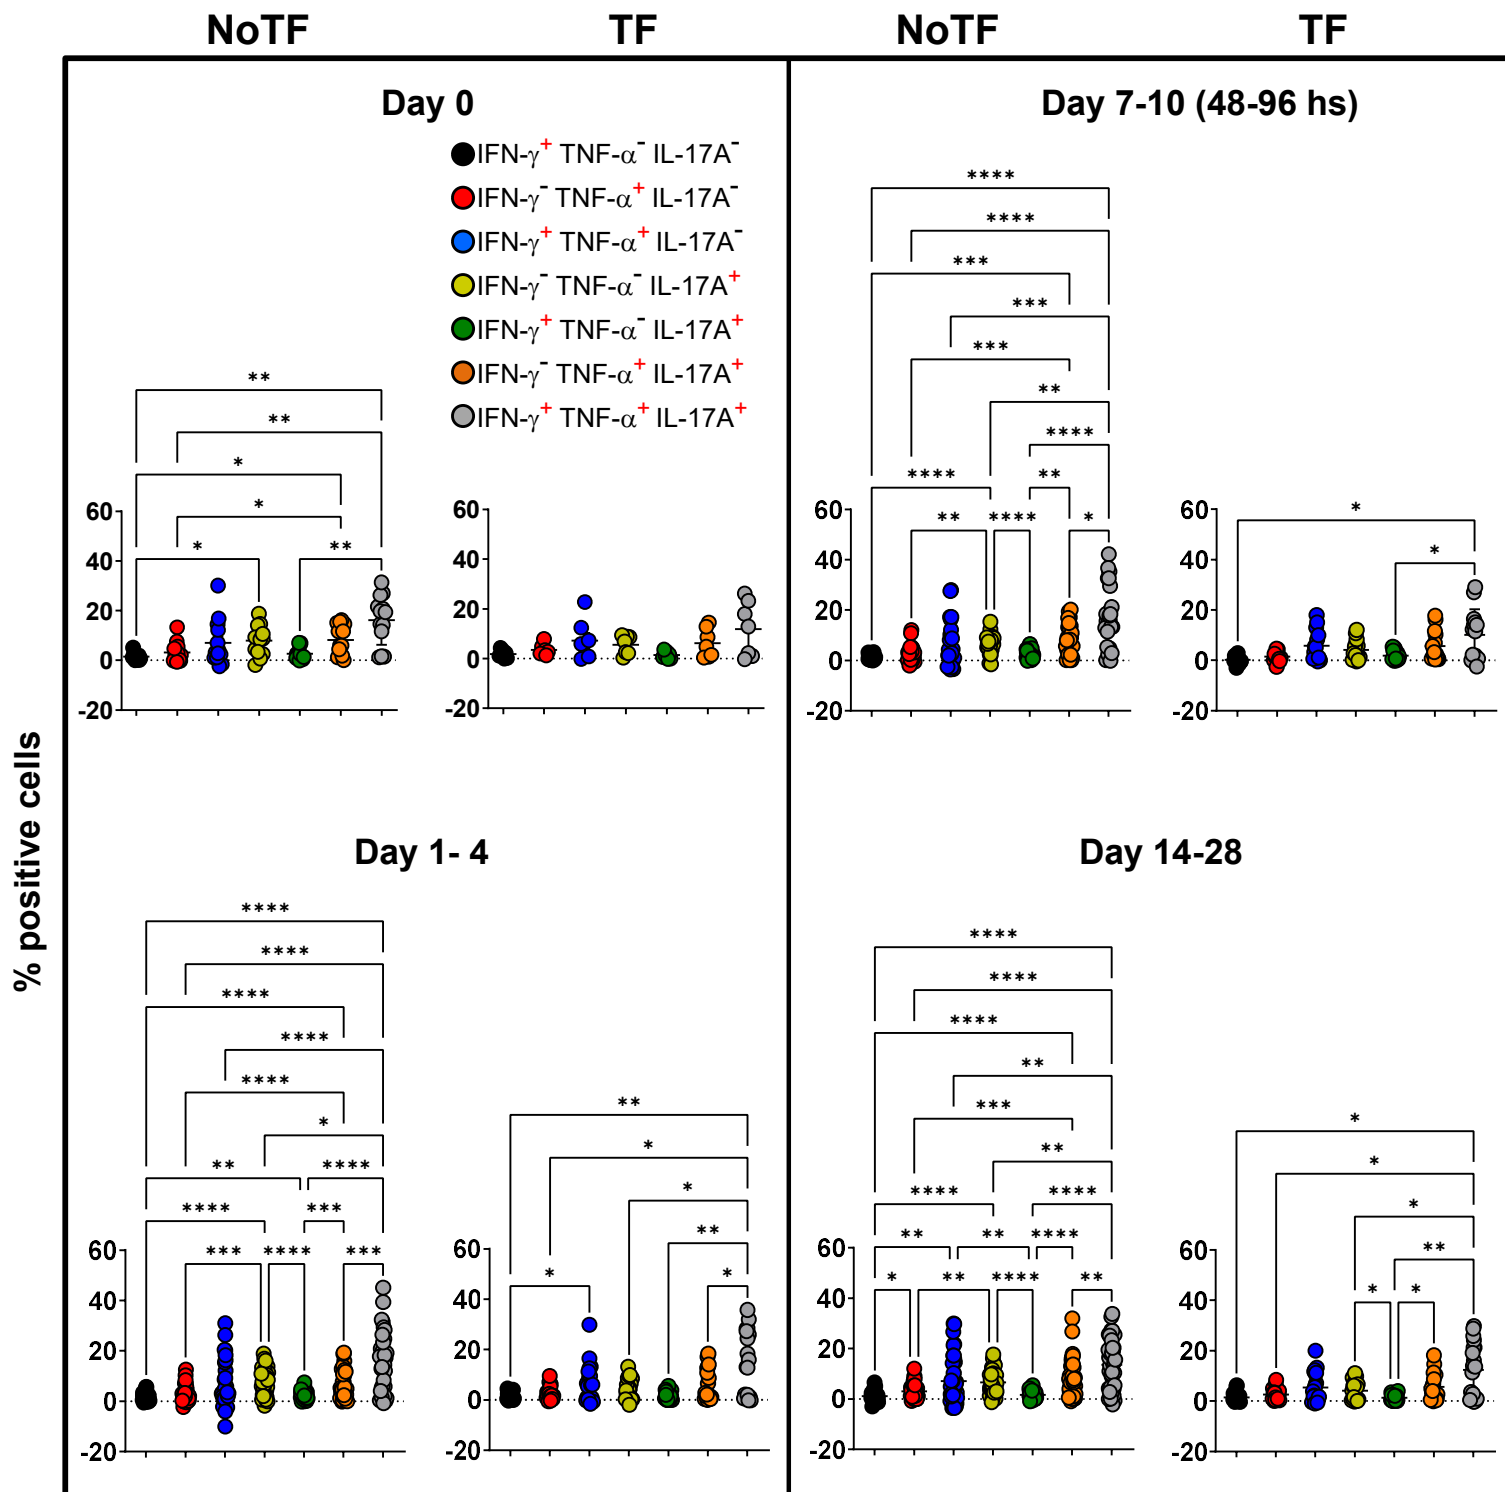

# S9 Figure

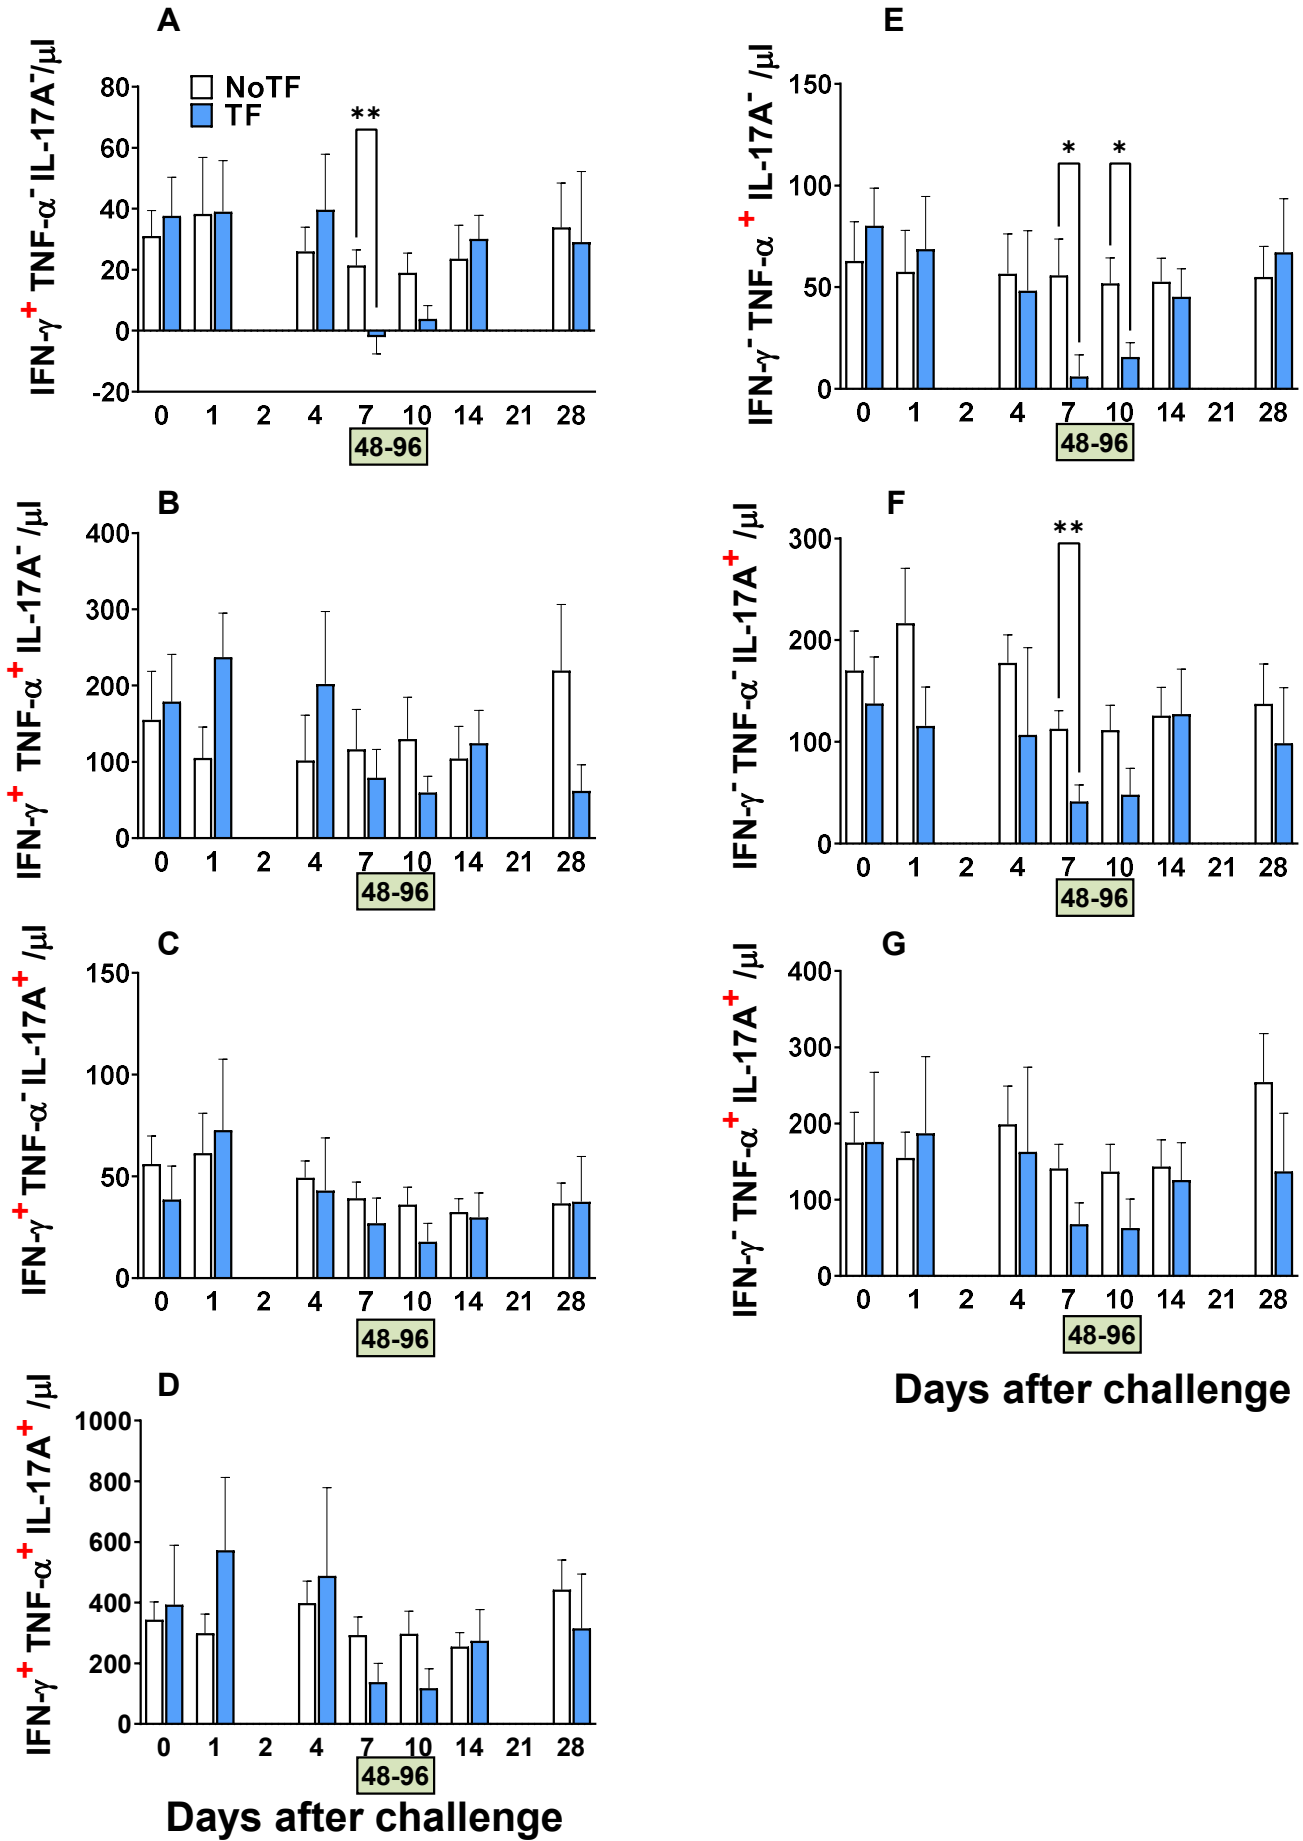

# S10 Figure

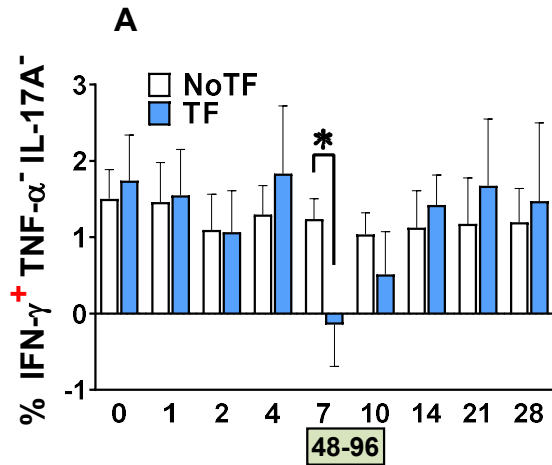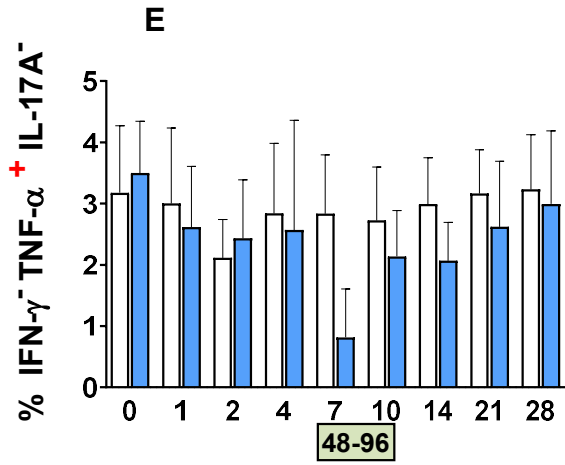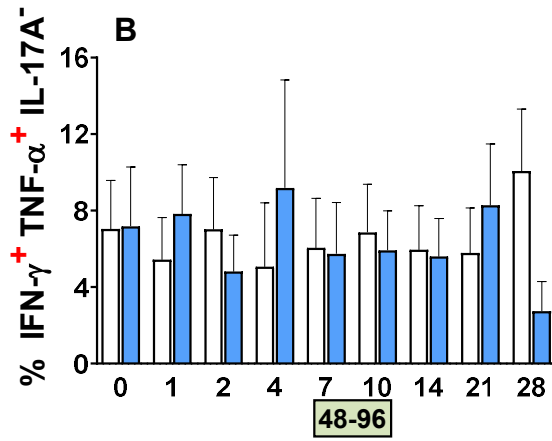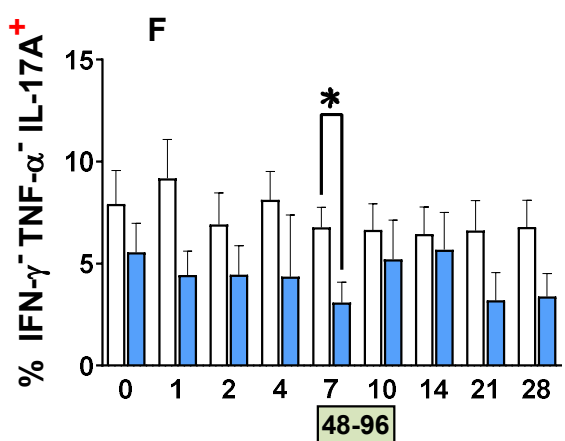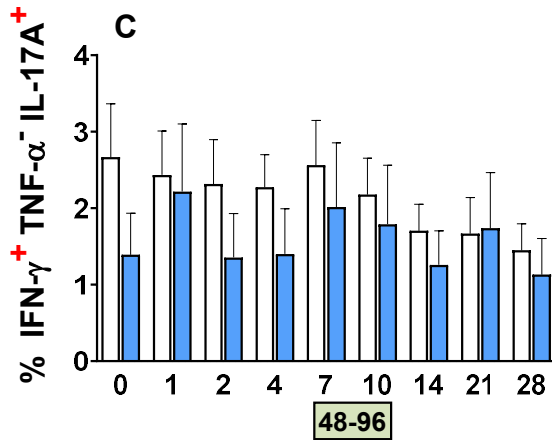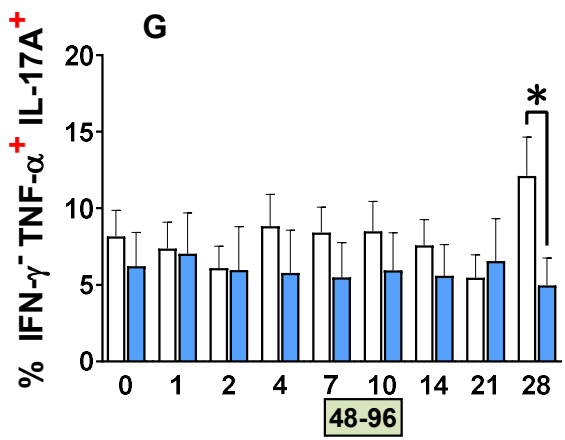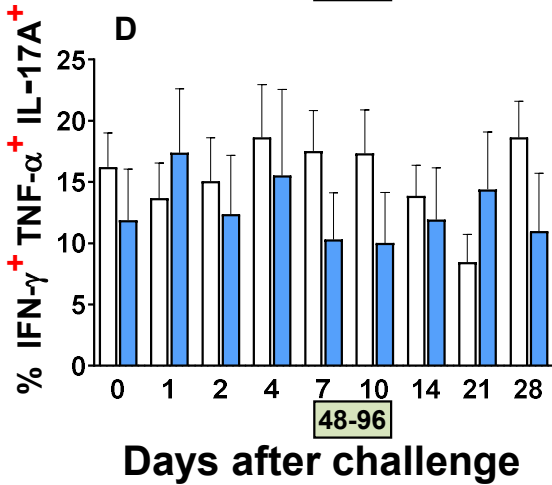

Days after challenge
